# Supplementary material for: Ti3C2Tx with a hydroxyl-rich surface for metal sulfides as high performance electrode materials for sodium/lithium storage
Source: Royal Society of Chemistry journal article supplement (doi:10.1039/d1ta02753k), 2021-01-01
Supplement: d1ta02753k1.pdf [file d1ta02753k1.pdf]

Supporting information for

**Hydroxyl-rich surface of  $\text{Ti}_3\text{C}_2\text{T}_x$  for metal sulfides as high performance electrode materials for sodium/lithium storage**

Qi Han<sup>1,§</sup>, Yanli Zhou<sup>1,§,\*</sup>, Rong Du<sup>1</sup>, Bo Xiao<sup>c</sup>, Jianbo Cheng<sup>c</sup>, Ming Zhang<sup>1</sup>, Caifu Dong<sup>1</sup>, Xueqin Sun<sup>1</sup>, Fuyi Jiang<sup>1,\*</sup> and Jian Yang<sup>b,\*</sup>

<sup>1</sup> School of Environmental and Material Engineering, Yantai University, Yantai 264005, P.R. China

<sup>b</sup> Key Laboratory of Colloid and Interface Chemistry, Ministry of Education School of Chemistry and Chemical Engineering, Shandong University, Jinan 250100, P.R. China

<sup>c</sup> The Laboratory of Theoretical and Computational Chemistry, School of Chemistry and Chemical Engineering, Yantai University, Yantai 264005, P.R. China

<sup>§</sup>Qi Han and Yanli Zhou contribute equally to this work

\*Corresponding author. E-mail: Yanli Zhou, [zhouyanli@ytu.edu.cn](mailto:zhouyanli@ytu.edu.cn); Fuyi Jiang, [fyjiang@ytu.edu.cn](mailto:fyjiang@ytu.edu.cn); Jian Yang, [yangjian@sdu.edu.cn](mailto:yangjian@sdu.edu.cn)

## Supplementary Figures and Tables

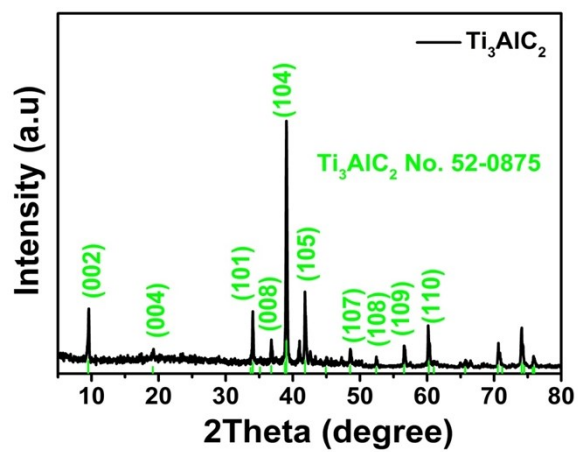

Fig. S1 XRD pattern of  $\text{Ti}_3\text{AlC}_2$ .

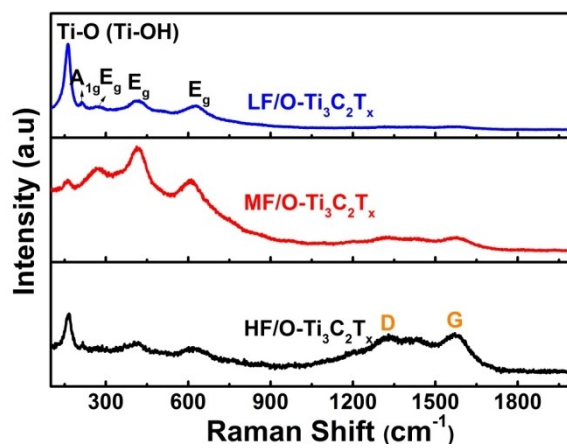

Fig. S2 Raman spectra of three  $\text{Ti}_3\text{C}_2\text{T}_x$ .

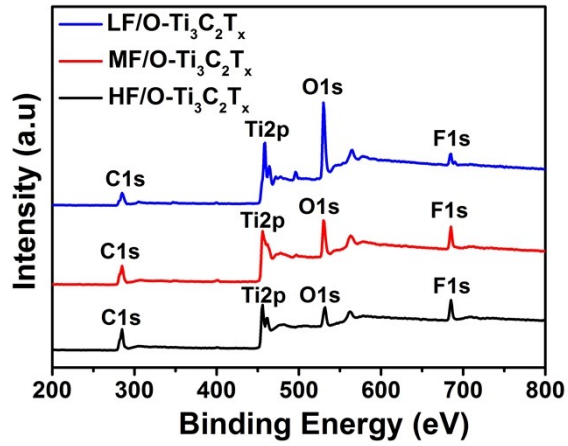

**Fig. S3** XPS survey spectrum of three  $\text{Ti}_3\text{C}_2\text{T}_x$ .

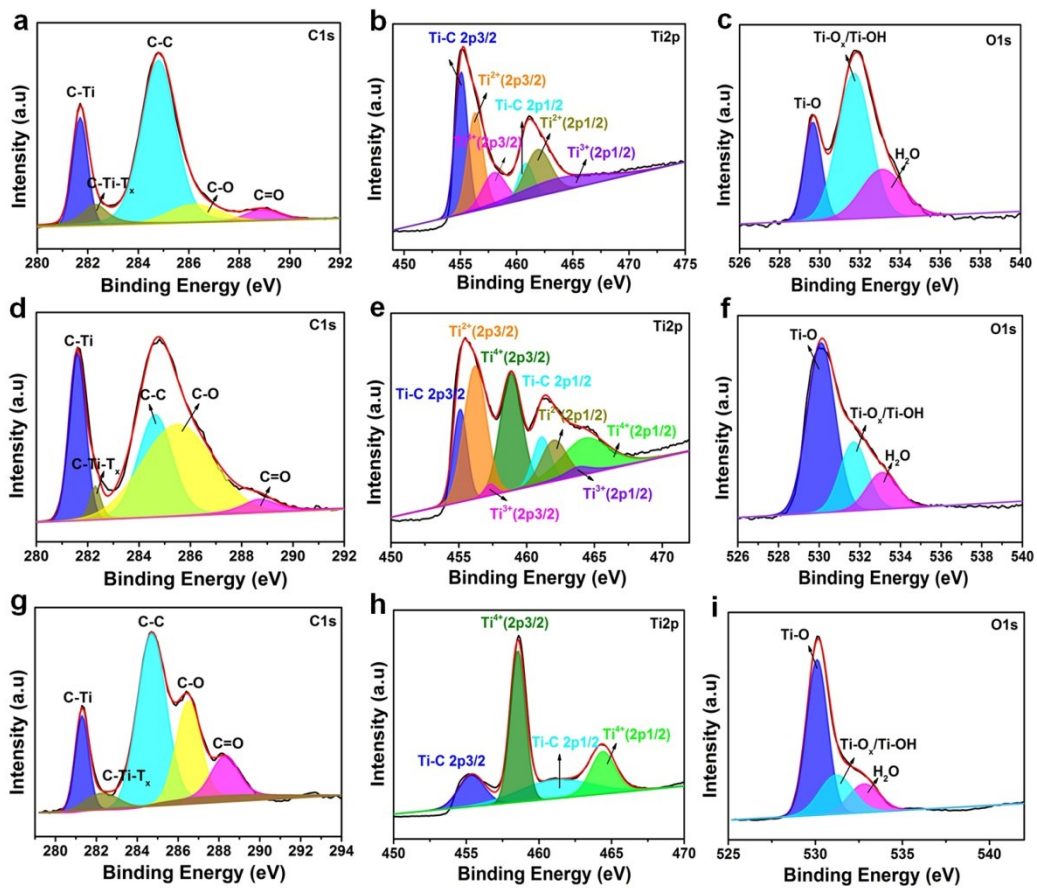

**Fig. S4** XPS spectra of C1s, Ti2p and O1s for three titanium carbides: (a-c) HF/ $\text{Ti}_3\text{C}_2\text{T}_x$ , (d-f) MF/ $\text{Ti}_3\text{C}_2\text{T}_x$  and (g-i) LF/ $\text{Ti}_3\text{C}_2\text{T}_x$ .

**Table S1** The atomic ratio of three  $\text{Ti}_3\text{C}_2\text{T}_x$  from EDS results.

| Sample                                  | <i>C-K</i> | <i>O-K</i> | <i>F-K</i> | <i>Al-K</i> | <i>Ti-K</i> |
|-----------------------------------------|------------|------------|------------|-------------|-------------|
| HF/O- $\text{Ti}_3\text{C}_2\text{T}_x$ | 13.62      | 34.88      | 24.41      | 0.30        | 26.79       |
| MF/O- $\text{Ti}_3\text{C}_2\text{T}_x$ | 16.98      | 41.88      | 18.75      | 0.13        | 22.26       |
| LF/O- $\text{Ti}_3\text{C}_2\text{T}_x$ | 13.37      | 52.62      | 6.05       | 0.56        | 28.38       |

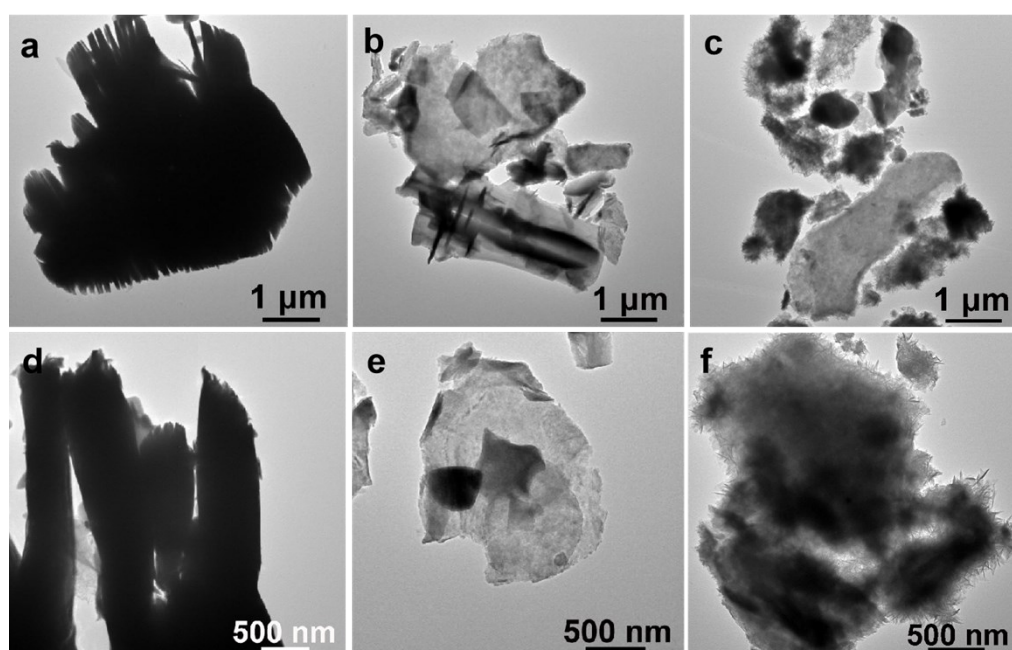

**Fig. S5** TEM images of (a, d) HF/O- $\text{Ti}_3\text{C}_2\text{T}_x$ , (b, e) MF/O- $\text{Ti}_3\text{C}_2\text{T}_x$ , (c, f) LF/O- $\text{Ti}_3\text{C}_2\text{T}_x$ .

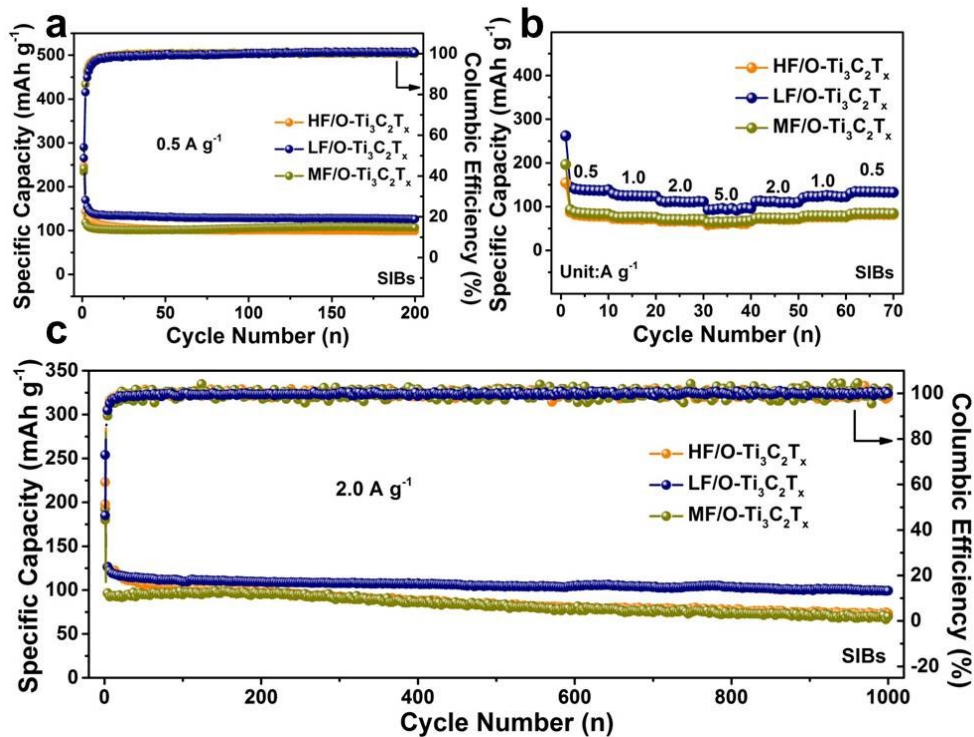

**Fig. S6** (a) cycling performance at  $0.5 \text{ A g}^{-1}$ , (b) rate capabilities and (c) high-rate cycling performance of three  $\text{Ti}_3\text{C}_2\text{T}_x$  for SIBs.

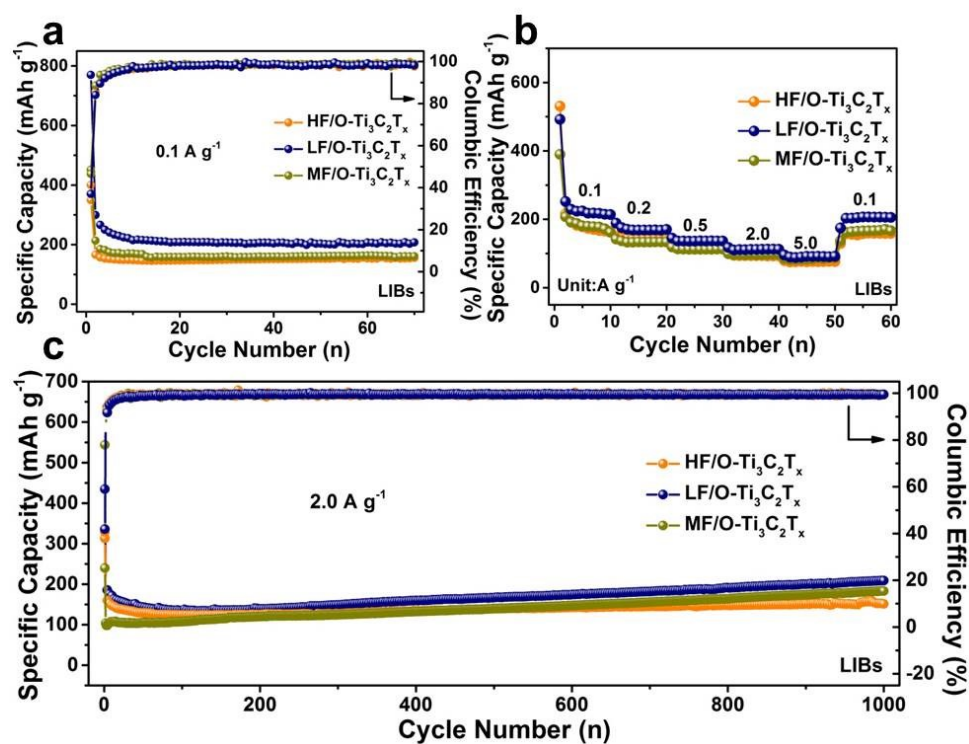

**Fig. S7** (a) cycling performance at  $0.1 \text{ A g}^{-1}$ , (b) rate capabilities and (c) high-rate cycling performance of three  $\text{Ti}_3\text{C}_2\text{T}_x$  for LIBs.

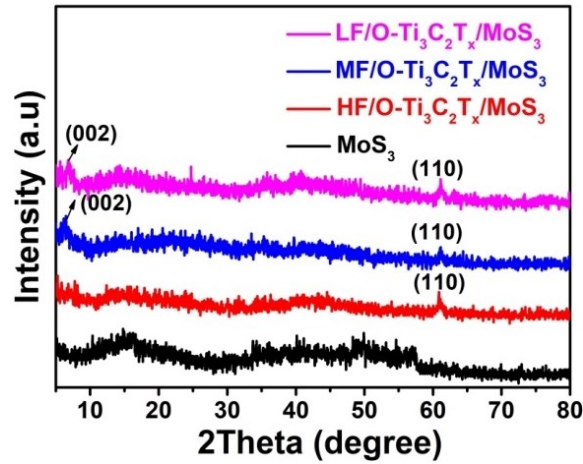

**Fig. S8** XRD patterns of  $\text{MoS}_3$ ,  $\text{HF/O-Ti}_3\text{C}_2\text{T}_x/\text{MoS}_3$ ,  $\text{MF/O-Ti}_3\text{C}_2\text{T}_x/\text{MoS}_3$  and  $\text{LF/O-Ti}_3\text{C}_2\text{T}_x/\text{MoS}_3$ .

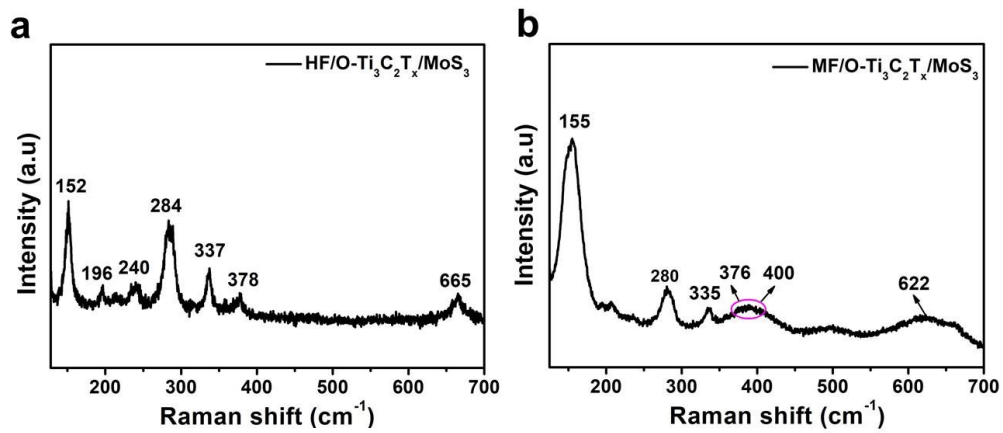

**Fig. S9** Raman spectra of (a)  $\text{HF/O-Ti}_3\text{C}_2\text{T}_x/\text{MoS}_3$  and (b)  $\text{MF/O-Ti}_3\text{C}_2\text{T}_x/\text{MoS}_3$ .

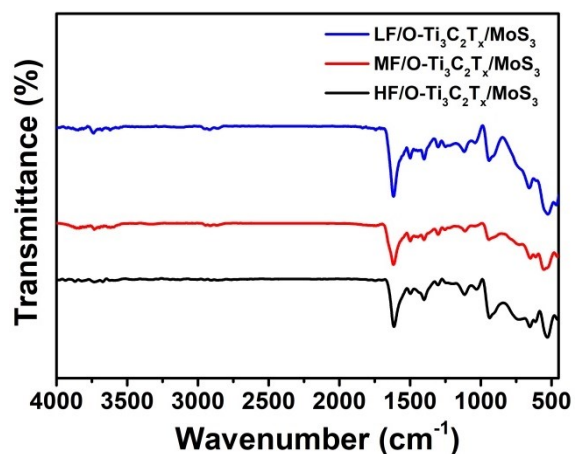

**Fig. S10** FT-IR spectra of HF/O-Ti<sub>3</sub>C<sub>2</sub>T<sub>x</sub>/MoS<sub>3</sub>, MF/O-Ti<sub>3</sub>C<sub>2</sub>T<sub>x</sub>/MoS<sub>3</sub> and LF/O-Ti<sub>3</sub>C<sub>2</sub>T<sub>x</sub>/MoS<sub>3</sub>.

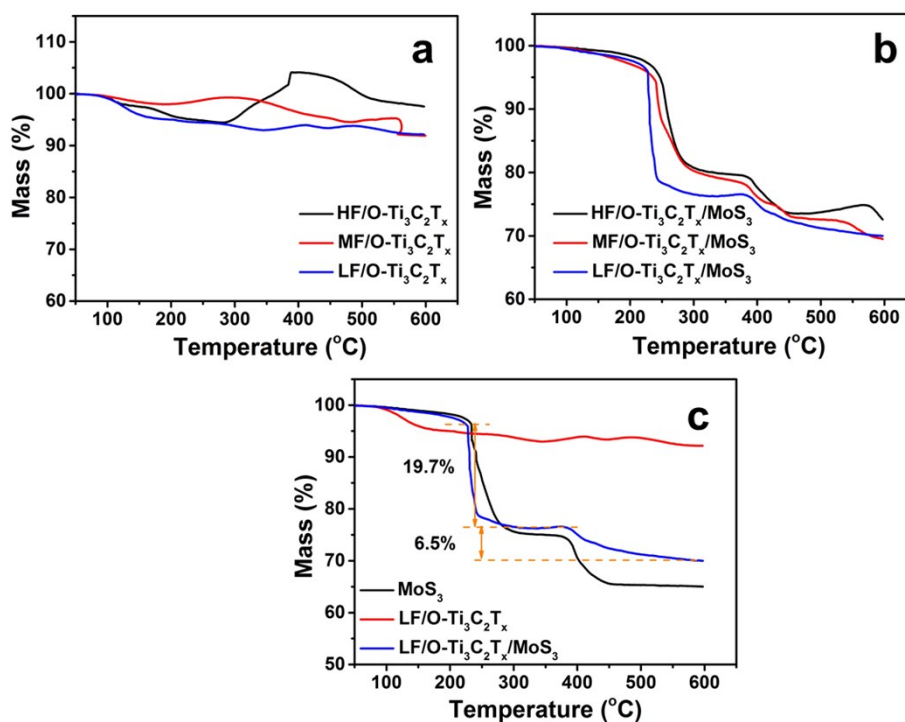

**Fig. S11** TG curves of (a) three Ti<sub>3</sub>C<sub>2</sub>T<sub>x</sub>, (b) three Ti<sub>3</sub>C<sub>2</sub>T<sub>x</sub>/MoS<sub>3</sub> composites, (c) pure MoS<sub>3</sub>, LF/O-Ti<sub>3</sub>C<sub>2</sub>T<sub>x</sub> and LF/O-Ti<sub>3</sub>C<sub>2</sub>T<sub>x</sub>/MoS<sub>3</sub>.

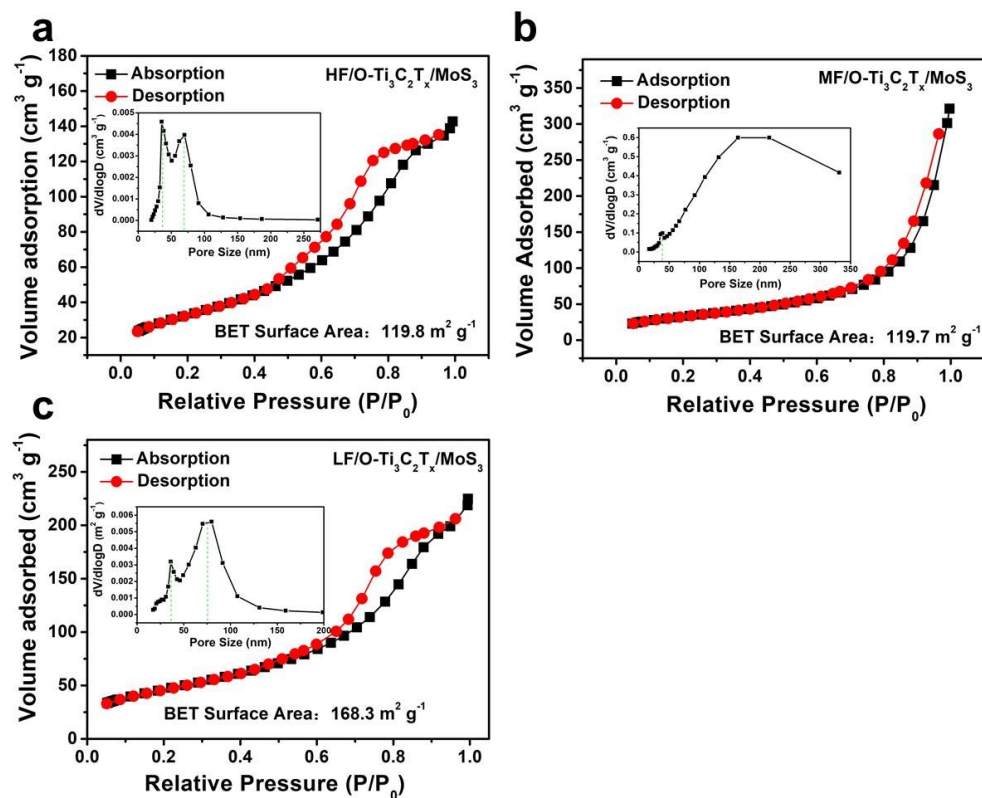

**Fig. S12**  $N_2$  adsorption-desorption isotherm and pore size distribution of (a) HF/O-Ti<sub>3</sub>C<sub>2</sub>T<sub>x</sub>/MoS<sub>3</sub>, (b) MF/O-Ti<sub>3</sub>C<sub>2</sub>T<sub>x</sub>/MoS<sub>3</sub> and (c) LF/O-Ti<sub>3</sub>C<sub>2</sub>T<sub>x</sub>/MoS<sub>3</sub>.

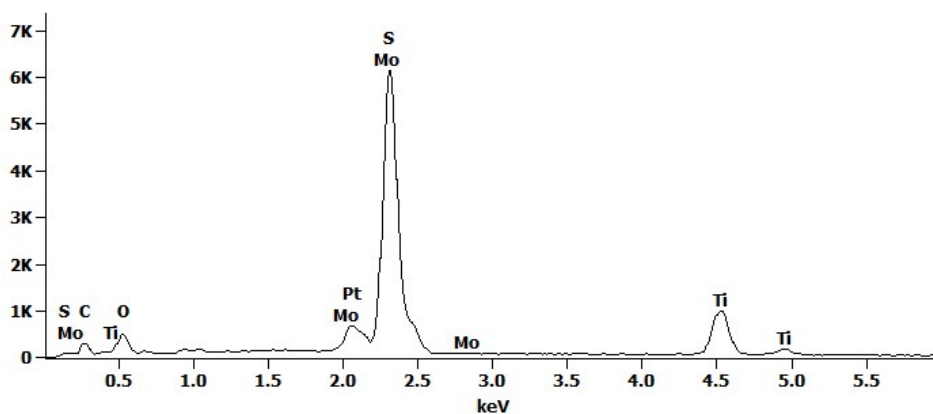

**Fig. S13** EDS spectrum of LF/O-Ti<sub>3</sub>C<sub>2</sub>T<sub>x</sub>/MoS<sub>3</sub>.



**Table S2** EDS result of LF/O-Ti<sub>3</sub>C<sub>2</sub>T<sub>x</sub>/MoS<sub>3</sub>.

|                     | <i>C-K</i> | <i>O-K</i> | <i>S-K</i> | <i>Ti-K</i> | <i>Mo-L</i> | <i>Pt-M</i> |
|---------------------|------------|------------|------------|-------------|-------------|-------------|
| <b>Atomic ratio</b> | 17.33      | 26.75      | 30.52      | 14.18       | 9.76        | 1.46        |
| <b>Mass ratio</b>   | 5.92       | 12.18      | 27.84      | 19.33       | 26.65       | 8.08        |

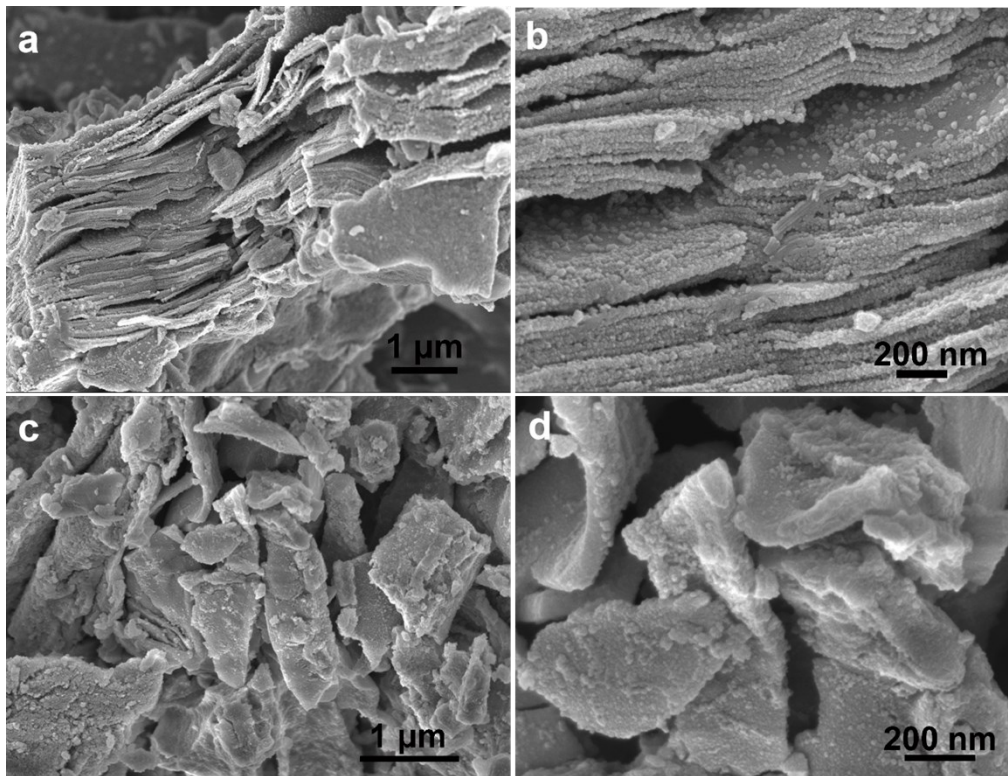

**Fig. S14** Low magnified and high magnified SEM images of (a, b) HF/O-Ti<sub>3</sub>C<sub>2</sub>T<sub>x</sub>/MoS<sub>3</sub>, (c, d) MF/O-Ti<sub>3</sub>C<sub>2</sub>T<sub>x</sub>/MoS<sub>3</sub>.

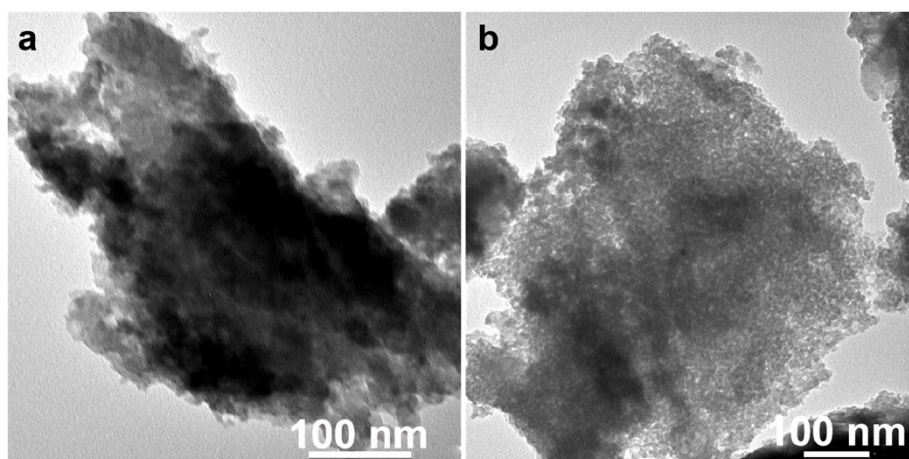

**Fig. S15** TEM images of (a) HF/O-Ti<sub>3</sub>C<sub>2</sub>T<sub>x</sub>/MoS<sub>3</sub>, (b) MF/O-Ti<sub>3</sub>C<sub>2</sub>T<sub>x</sub>/MoS<sub>3</sub>.

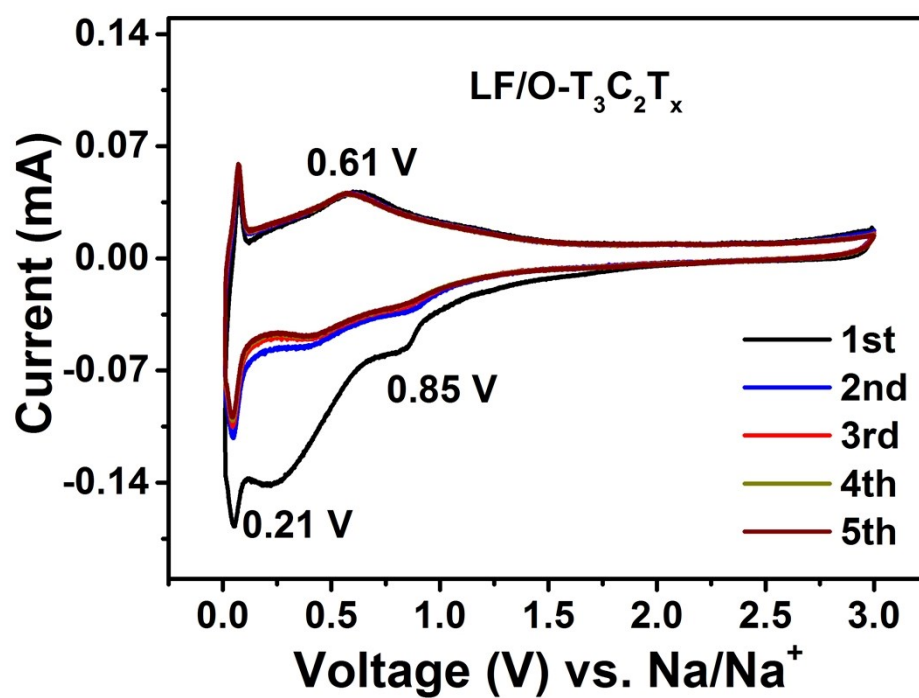

**Fig. S16** CV curves of LF/O-Ti<sub>3</sub>C<sub>2</sub>T<sub>x</sub> for the first five cycles for SIBs.

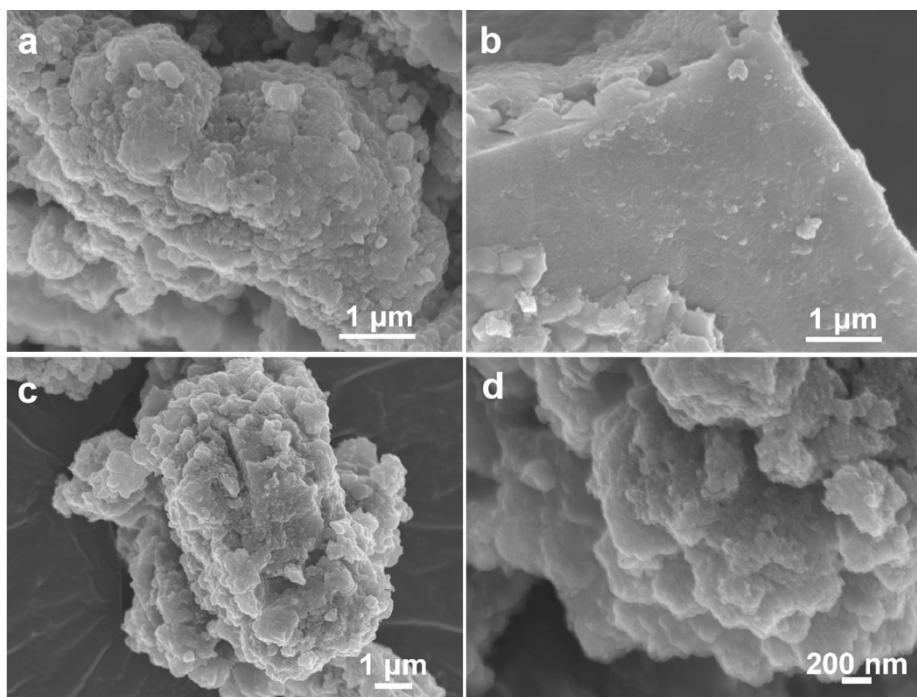

**Fig. S17** SEM images of cycled electrodes: (a) HF/O-Ti<sub>3</sub>C<sub>2</sub>T<sub>x</sub>/MoS<sub>3</sub>, (b) MF/O-Ti<sub>3</sub>C<sub>2</sub>T<sub>x</sub>/MoS<sub>3</sub>, (c, d) LF/O-Ti<sub>3</sub>C<sub>2</sub>T<sub>x</sub>/MoS<sub>3</sub>.

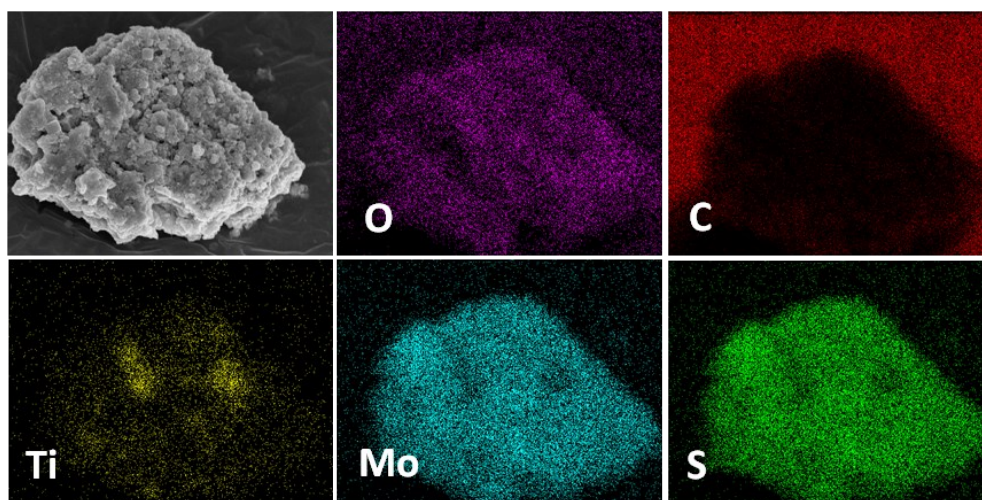

**Fig. S18** SEM element mapping of cycled LF/O-Ti<sub>3</sub>C<sub>2</sub>T<sub>x</sub>/MoS<sub>3</sub> electrode.

**Table S3** The sodium storage performance comparison of molybdenum sulfide related composites.

| Samples                                                              | Current density<br>(mA g <sup>-1</sup> ) | Cycle numbers | Specific<br>capacity<br>(mAh g <sup>-1</sup> ) | Ref.         |
|----------------------------------------------------------------------|------------------------------------------|---------------|------------------------------------------------|--------------|
| (MoS <sub>2</sub> /CF)@MoS <sub>2</sub> @C                           | 100                                      | 200           | 773                                            | [22]         |
|                                                                      | 1000                                     | 1000          | 332                                            |              |
| MoS <sub>2</sub> /rGO papers                                         | 25                                       | 20            | 230                                            | [25]         |
| DP-MoS <sub>2</sub>                                                  | 500                                      | 200           | 300                                            | [28]         |
|                                                                      | 2000                                     | 500           | 220                                            |              |
| LTO/MoS <sub>2</sub>                                                 | 2000                                     | 200           | 101                                            | [S1]         |
| amorphous MoS <sub>3</sub>                                           | 2000                                     | 500           | 493                                            | [S2]         |
| Bi <sub>2</sub> S <sub>3</sub> /MoS <sub>2</sub>                     | 500                                      | 100           | 427                                            | [S3]         |
| MoS <sub>2</sub> /NCF-MP                                             | 100                                      | 100           | 480                                            | [S4]         |
|                                                                      | 1000                                     | 300           | 390                                            |              |
| MoS <sub>2</sub> -CCNCs                                              | 100                                      | 100           | 385                                            | [S5]         |
|                                                                      | 2000                                     | 1000          | 298                                            |              |
| 3D MoS <sub>2</sub> MFs                                              | 200                                      | 100           | 500                                            | [S6]         |
| MoS <sub>2</sub> @C@MoS <sub>2</sub>                                 | 100                                      | 100           | 434                                            | [S7]         |
|                                                                      | 1000                                     | 200           | 352                                            |              |
| HMF-MoS <sub>2</sub>                                                 | 100                                      | 100           | 384                                            | [S8]         |
|                                                                      | 1000                                     | 125           | 267                                            |              |
| MoS <sub>2</sub> /G                                                  | 100                                      | 60            | 432                                            | [S9]         |
|                                                                      | 300                                      | 250           | 441                                            |              |
| C@MoS <sub>2</sub> @PPy                                              | 100                                      | 100           | 713                                            | [S10]        |
|                                                                      | 5000                                     | 500           | 294                                            |              |
| LF/O-Ti <sub>3</sub> C <sub>2</sub> T <sub>x</sub> /MoS <sub>3</sub> | 500                                      | 180           | 973                                            | This<br>work |
|                                                                      | 2000                                     | 1000          | 611                                            |              |

**Table S4** Interaction energies, charge transfers and distances between MXenes and MoS<sub>3</sub>.

|                                                                     | Interaction energy (eV) | Charge transfer (e) | Distance (Å) |
|---------------------------------------------------------------------|-------------------------|---------------------|--------------|
| Ti <sub>3</sub> C <sub>2</sub> F <sub>2</sub> + MoS <sub>3</sub>    | -0.05                   | -0.11               | 3.10         |
| Ti <sub>3</sub> C <sub>2</sub> O <sub>2</sub> + MoS <sub>3</sub>    | -0.48                   | -0.57               | 2.85         |
| Ti <sub>3</sub> C <sub>2</sub> (OH) <sub>2</sub> + MoS <sub>3</sub> | -4.93                   | 1.96                | 1.81         |

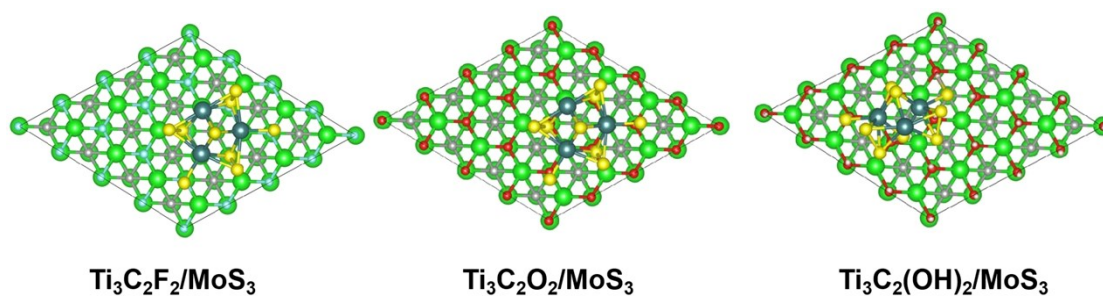

**Fig. S19** Top views of the most stable adsorption structures for MoS<sub>3</sub> on Ti<sub>3</sub>C<sub>2</sub>F<sub>2</sub>, Ti<sub>3</sub>C<sub>2</sub>O<sub>2</sub> and Ti<sub>3</sub>C<sub>2</sub>(OH)<sub>2</sub>.

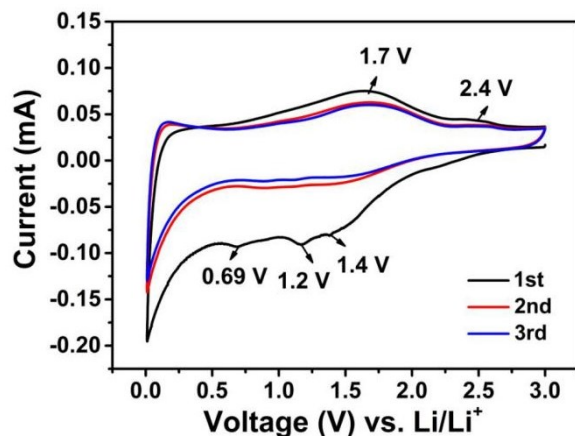

**Fig. S20** CV curves of LF/O-Ti<sub>3</sub>C<sub>2</sub>T<sub>x</sub> for the first three cycles for LIBs.

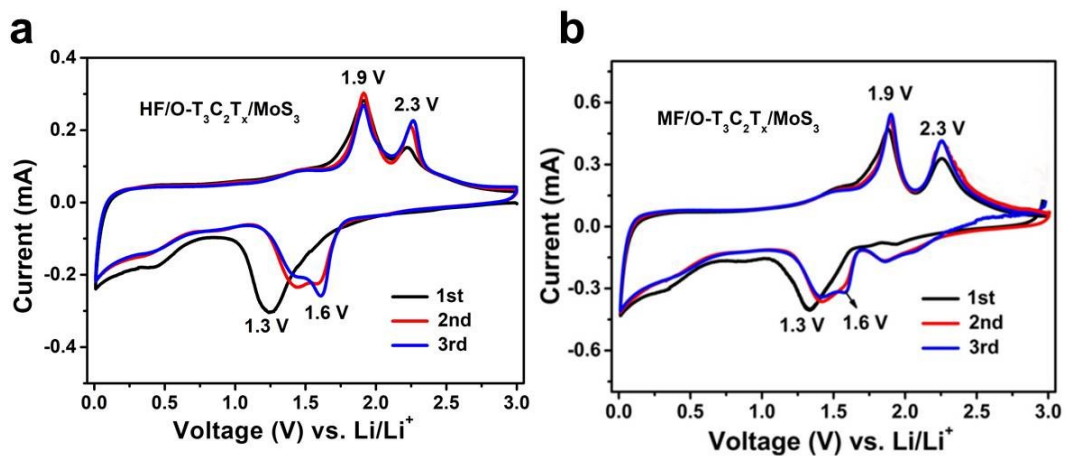

**Fig. S21** CV curves of (a) HF/O-Ti<sub>3</sub>C<sub>2</sub>T<sub>x</sub>/MoS<sub>3</sub>, (b) MF/O-Ti<sub>3</sub>C<sub>2</sub>T<sub>x</sub>/MoS<sub>3</sub> for LIBs.

**Table S5** The lithium storage performance comparison of  $\text{Ti}_3\text{C}_2\text{T}_x$  related composites.

| Samples                                                                     | Current density<br>(mA g <sup>-1</sup> ) | Cycle numbers | Specific<br>capacity<br>(mAh g <sup>-1</sup> ) | Ref.  |
|-----------------------------------------------------------------------------|------------------------------------------|---------------|------------------------------------------------|-------|
| s- $\text{Ti}_3\text{C}_2\text{T}_x/\text{Fe}_3\text{O}_4$                  | 100                                      | 100           | 450                                            | [35]  |
|                                                                             | 2000                                     | 1000          | 327                                            |       |
| $\text{Ti}_3\text{C}_2\text{T}_x/\text{CNTs}$                               | 500                                      | 500           | 287                                            | [S11] |
| $\text{CNTs}@ \text{Ti}_3\text{C}_2\text{T}_x$                              | 1000                                     | 200           | 408                                            | [S12] |
| $\text{CNFs}/\text{Ti}_3\text{C}_2\text{T}_x$                               | 300                                      | 1800          | 320                                            | [S13] |
| $\text{MoS}_2/\text{Ti}_3\text{C}_2\text{T}_x$                              | 100                                      | 70            | 614                                            | [S14] |
| $\text{RGO}/\text{Ti}_3\text{C}_2\text{T}_x$                                | 500                                      | 200           | 150                                            | [S15] |
| $\text{Fe}_3\text{O}_4@ \text{Ti}_3\text{C}_2$                              | 600                                      | 800           | 278                                            | [S16] |
| $\text{SnO}_2/\text{Ti}_3\text{C}_2$                                        | 100                                      | 200           | 360                                            | [S17] |
| $\text{Bi}_2\text{MoO}_6/\text{MXene}$                                      | 100                                      | 200           | 692                                            | [S18] |
|                                                                             | 1000                                     | 1000          | 545                                            |       |
| Red P/ $\text{Ti}_3\text{C}_2\text{T}_x$                                    | 200                                      | 600           | 585                                            | [S19] |
| $\text{Co}_3\text{O}_4@ \text{MF}/\text{O}-\text{Ti}_3\text{C}_2\text{T}_x$ | 1000                                     | 700           | 550                                            | [S20] |
| $\text{Li}_3\text{VO}_4/\text{Ti}_3\text{C}_2\text{T}_x$                    | 2000                                     | 1000          | 146                                            | [S21] |
| $\text{SnS}/\text{Ti}_3\text{C}_2$                                          | 100                                      | 100           | 646                                            | [S22] |
| $\text{CoFeO}_4/\text{Ti}_3\text{C}_2\text{T}_x$                            | 900                                      | 100           | 200                                            | [S23] |
| $\text{Co}_3\text{O}_4$ QDs/ $\text{MXene}$                                 | 100                                      | 100           | 758                                            | [S24] |
| LF/O- $\text{Ti}_3\text{C}_2\text{T}_x/\text{MoS}_3$                        | 100                                      | 100           | 915                                            | This  |
|                                                                             | 2000                                     | 1000          | 502                                            | work  |

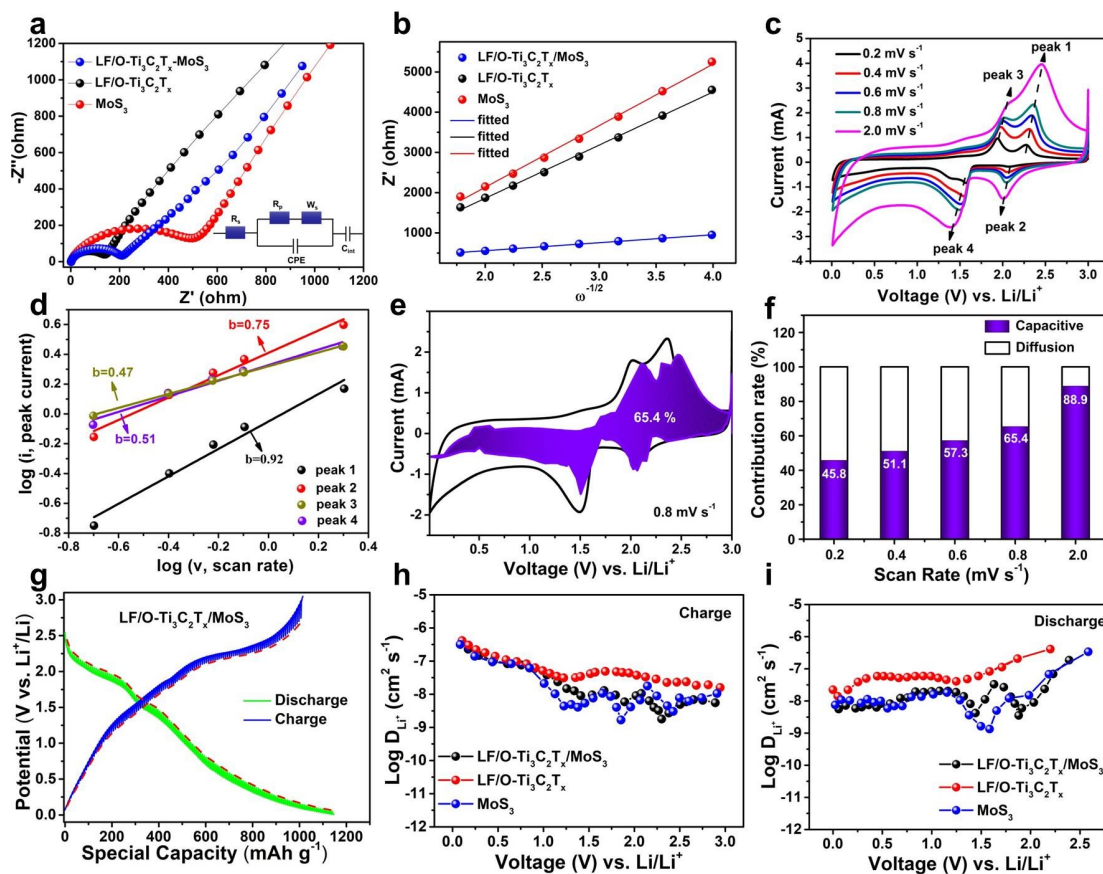

**Fig. S22** Electrochemical kinetic analysis of LF/O-Ti<sub>3</sub>C<sub>2</sub>T<sub>x</sub>/MoS<sub>3</sub> electrodes for LIBs: (a) EIS plots (the inset is the equivalent circuit), (b) relationship between  $Z'$  and  $\omega^{-1/2}$  of three kinds of electrodes, (c) CV curves at different scan rates, (d) relationship between  $\log i$  and  $\log v$  of cathodic and anodic peaks, (e) CV curves with capacitive contribution to the charge storage of  $0.8 \text{ mV s}^{-1}$ , (f) capacitive contribution rates at different scan rates, (g) GITT profiles (current pulse at  $50 \text{ mA g}^{-1}$  for 10 min followed by 1 h relaxation) and  $\text{Li}^+$  diffusion coefficients at different voltages of (h) discharge and (i) charge process.

The electrochemical reaction kinetics of LF/O-Ti<sub>3</sub>C<sub>2</sub>T<sub>x</sub>/MoS<sub>3</sub> was discussed. As observed in Fig. S22a, the semicircle diameter of LF/O-Ti<sub>3</sub>C<sub>2</sub>T<sub>x</sub>/MoS<sub>3</sub> is much smaller than that of pure MoS<sub>3</sub>, which indicates the small charge transfer impedance of LF/O-Ti<sub>3</sub>C<sub>2</sub>T<sub>x</sub>/MoS<sub>3</sub> upon cycling. From  $Z'$  vs.  $\omega^{-1/2}$  curves presented in Fig. S22b, the LF/O-Ti<sub>3</sub>C<sub>2</sub>T<sub>x</sub>/MoS<sub>3</sub> exhibits the lowest slope than those of MoS<sub>3</sub> and LF/O-Ti<sub>3</sub>C<sub>2</sub>T<sub>x</sub>, illustrating its fast lithium-ion transport kinetics in the interior of composite



electrode. The electrochemical mechanism of above electrode was also investigated to better understand the prominent lithium storage performance of LF/O-Ti<sub>3</sub>C<sub>2</sub>T<sub>x</sub>/MoS<sub>3</sub>. The CV curves at different scan rates show similar shapes with two pairs of cathodic and anodic peaks (Fig. S22c). The linear relationship of log i and log v shown in Fig. S22d shows that the b values for the two pairs of oxidation and reduction peaks are 0.92, 0.75 and 0.47, 0.51, respectively. The high b values for peak 1 and peak 2 indicate that the overall charge storage process is a mixture of battery and capacitance behavior, while two b values approaching 0.5 for peak 3 and peak 4 show the diffusion controlled battery behavior. As observed in Fig. S22e, the proportion of capacitance contribution from the shaded area is 65.4% at 0.8 mV s<sup>-1</sup>. Figure S22f further shows that the capacitance contribution gradually enhances with the increase of scan rate. When the scan rate increases to 2 mV s<sup>-1</sup>, the capacitance contribution for LF/O-Ti<sub>3</sub>C<sub>2</sub>T<sub>x</sub>/MoS<sub>3</sub> is as high as 88.9%, indicating the capacitance contribution will almost dominate the overall charge storage at high rates. GITT was also used to study the Li<sup>+</sup> reaction kinetics. A small overpotential can be observed from GITT profiles (Fig. S22g), and the Li<sup>+</sup> diffusion coefficients of LF/O-Ti<sub>3</sub>C<sub>2</sub>T<sub>x</sub>/MoS<sub>3</sub> electrode is slightly smaller than that of LF/O-Ti<sub>3</sub>C<sub>2</sub>T<sub>x</sub> and comparative with that of MoS<sub>3</sub> (Figs. S22h and S22i), these values are higher than the other reported anode materials, indicating the good diffusion kinetics behavior of LF/O-Ti<sub>3</sub>C<sub>2</sub>T<sub>x</sub>/MoS<sub>3</sub>. The obvious decrease of Li<sup>+</sup> diffusion coefficients at discharge /charge voltage plateau suggests its bigger diffusion resistance during the electrochemical reaction process.

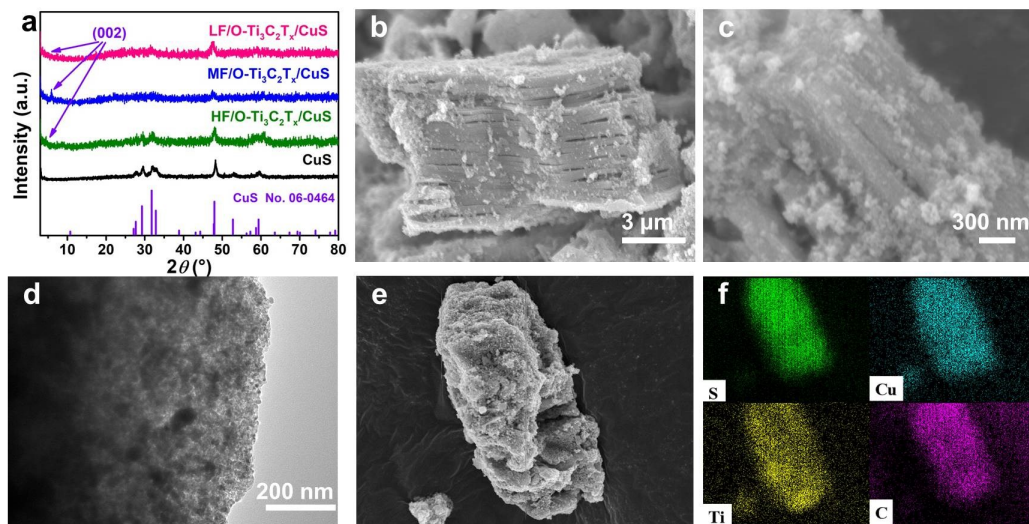

**Fig. S23** Structures and morphologies of LF/O-Ti<sub>3</sub>C<sub>2</sub>T<sub>x</sub>/CuS: (a) XRD patterns, (b) low magnified and (c) high magnified SEM images, (d) TEM image, (e, f) EDS elemental mapping.

Similar to LF/O-Ti<sub>3</sub>C<sub>2</sub>T<sub>x</sub>/MoS<sub>3</sub>, the dispersion of three titanium carbides was respectively added into a solution containing Cu<sup>2+</sup> and S<sup>2-</sup>. Afterwards, the temperature rose to 70 °C and the formed CuS crystal nucleus will deposit on the inner and outer surfaces of Ti<sub>3</sub>C<sub>2</sub>T<sub>x</sub>. Figure S23a shows the XRD patterns of three Ti<sub>3</sub>C<sub>2</sub>T<sub>x</sub>/CuS. As observed, two obvious diffraction peaks located at 31.78 ° and 47.94° are well matched with the (103) and (110) planes of hexagonal CuS (JCPDS No. 06-0464). Except for the diffraction peaks of CuS, two diffraction peaks located before 10° and around 60° can be observed in the XRD patterns of three composites, suggesting the existence of Ti<sub>3</sub>C<sub>2</sub>T<sub>x</sub>. The weakness of (002) plane is probably attributed to the CuS loading on the surface of Ti<sub>3</sub>C<sub>2</sub>T<sub>x</sub>. Figures S23b and S23c show the corresponding SEM images of LF/O-Ti<sub>3</sub>C<sub>2</sub>T<sub>x</sub>/CuS. The magnified SEM image clearly shows that some small CuS nanoparticles are successfully loaded onto the inner and outer surfaces of LF/O-Ti<sub>3</sub>C<sub>2</sub>T<sub>x</sub>. Furthermore, the SEM mapping further shows the uniform distribution of Ti, C, Cu, S and O elements (Figs. S23e-f). The atomic ratio of Cu and S is 1: 0.95, which is in agreement with CuS. In addition, the TEM image of LF/O-Ti<sub>3</sub>C<sub>2</sub>T<sub>x</sub>/CuS is shown in Fig. S23d. As observed, the surface of LF/O-Ti<sub>3</sub>C<sub>2</sub>T<sub>x</sub> is uniformly coated by numerous CuS nanoparticles.

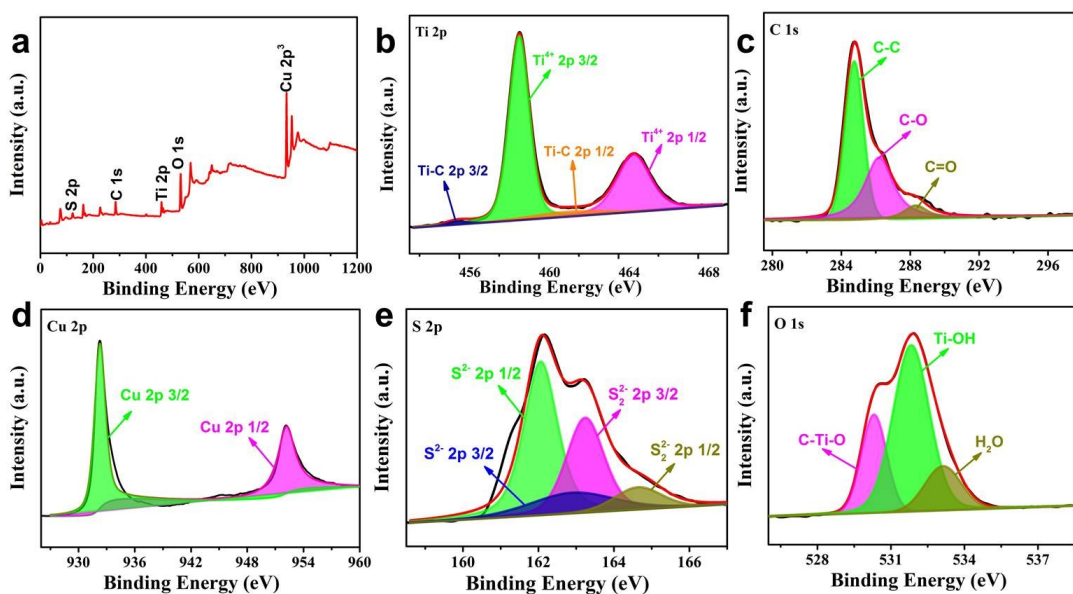

**Fig. S24** XPS spectra of (a) survey spectrum, high resolution spectra of (b) Ti 2p, (c) C 1s, (d) Cu 2p, (e) S 2p, (f) O 1s of LF/O-Ti<sub>3</sub>C<sub>2</sub>T<sub>x</sub>/CuS.

The XPS survey spectrum shown in Fig. S24a reveals the existence of signals peaks of Cu, S, Ti, O and C elements, demonstrating the successful synthesis of LF/O-Ti<sub>3</sub>C<sub>2</sub>T<sub>x</sub>/CuS. As for the Ti 2p (Fig. S24b), the Ti-C peaks can be fitted with two peaks located at 455.9 and 461.4 eV. The peaks situated at 459.0 and 464.7 eV can be assigned to the Ti-OH of Ti<sup>4+</sup> 2p<sub>3/2</sub> and Ti<sup>4+</sup> 2p<sub>1/2</sub> [S25]. Three peaks located at 284.8, 286.2 and 288.3 eV for C 1s spectrum are assigned to C-C, C-O and C=O, respectively (Fig. S24c). Two primary peaks situated at 952.2 and 932.3 eV for Cu 2p spectrum are indexed to Cu<sup>2+</sup> 2p<sub>1/2</sub> and 2p<sub>3/2</sub>, respectively (Fig. S24d) [S26]. Two peaks located at 162.1 eV (S 2p<sub>3/2</sub>) and 162.9 eV (S 2p<sub>1/2</sub>) for S 2p spectrum are ascribed to S<sup>2-</sup>, and the other two peaks at 163.2 eV and 164.6 eV for S 2p spectrum are correspond to the S<sup>24-</sup> in Cu-S-S-Cu configuration (Fig. S24e) [S27]. Figure S24f shows the high-resolution XPS spectrum of O 1s, which can be fitted with three peaks centered at 530.3, 531.8 and 533.1 eV. The shoulder at 533.1 eV is due to H<sub>2</sub>O. The peaks at 530.3 and 531.8 eV can be ascribed to C-Ti-O and Ti-OH [S28].

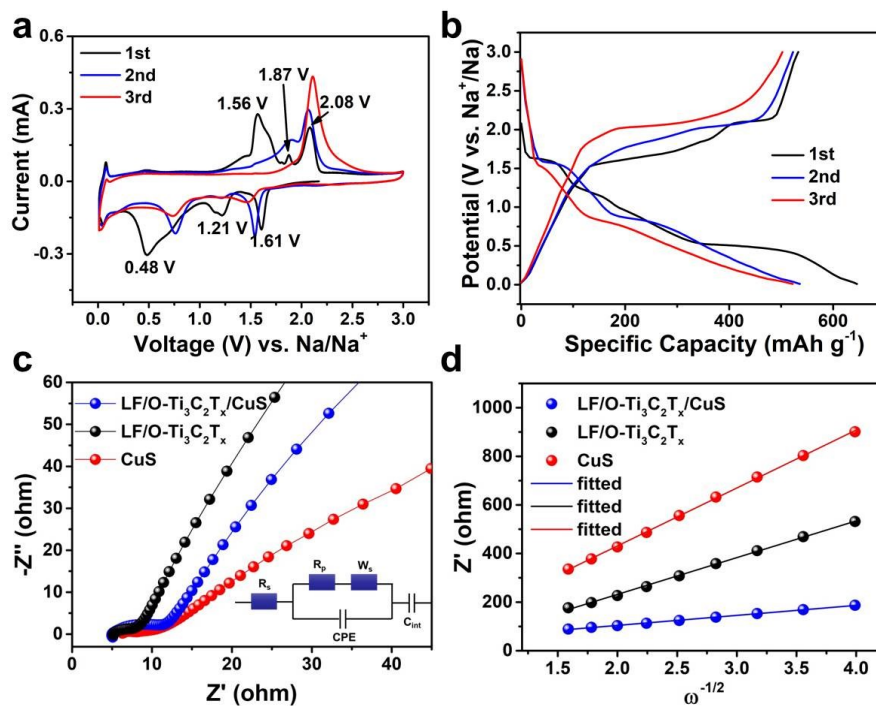

**Fig. S25** (a) CV curves of LF/O-Ti<sub>3</sub>C<sub>2</sub>T<sub>x</sub>/CuS at 0.1 mV s<sup>-1</sup>, (b) charge/discharge curves, (c) EIS plots (the inset is the equivalent circuit), (d) relationship between  $Z'$  and  $\omega^{-1/2}$  in the low frequency region of LF/O-Ti<sub>3</sub>C<sub>2</sub>T<sub>x</sub>/CuS for SIBs.

Figure S25a first shows the CV curves. In the first negative scan, three cathode peaks located at 1.61, 1.21 and 0.48 V are attributed to the multi-step phase conversion of CuS to Na<sub>2</sub>S and Cu as well as the formation of SEI film, respectively. In the first positive scan, two strong anodic peaks at around 1.56 and 2.08 V corresponds to the conversion from Cu and Na<sub>2</sub>S to the intermediary Na<sub>α</sub>Cu<sub>β</sub>S<sub>γ</sub>, and then to Cu<sub>2-x</sub>S. Also, the weak hump can be witnessed at 1.87 V, which may be caused by the side reaction of electrode and electrolyte [S29,S30]. However, the cathodic and anodic peaks for the second and subsequent cycles have obvious peak shift in comparison with those of first cycle due to the slow activation process [S31]. The voltage platforms in charge/discharge profiles of LF/O-Ti<sub>3</sub>C<sub>2</sub>T<sub>x</sub>/CuS correspond well with those of redox peaks in CV curves (Fig. S25b). The discharge/charge capacity for the first cycle is 646/533 mAh g<sup>-1</sup>, respectively, corresponding to a CE of 82%. The small charge transfer impedance (Fig. S25c), and lower slope than that of MoS<sub>3</sub> and LF/O-Ti<sub>3</sub>C<sub>2</sub>T<sub>x</sub> in Fig. S25d illustrate its fast electron and sodium-ion transport kinetics.

**Table S6** The sodium storage performance comparison of CuS related composites.

| Samples                                                 | Current density<br>(mA g <sup>-1</sup> ) | Cycle numbers | Specific<br>capacity<br>(mAh g <sup>-1</sup> ) | Ref.  |
|---------------------------------------------------------|------------------------------------------|---------------|------------------------------------------------|-------|
| PNL-CuS                                                 | 100                                      | 100           | 522                                            | [S29] |
| CuS NWs@NC                                              | 200                                      | 100           | 571                                            | [S31] |
| CuS microspheres                                        | 200                                      | 200           | 162                                            | [S32] |
| hollow CuS                                              | 100                                      | 100           | 361                                            | [S33] |
| CuS-RGO                                                 | 100                                      | 50            | 392                                            | [S34] |
|                                                         | 1000                                     | 450           | 345                                            |       |
| LF/O-Ti <sub>3</sub> C <sub>2</sub> T <sub>x</sub> /CuS | 500                                      | 200           | 597                                            | This  |
|                                                         | 2000                                     | 400           | 553                                            | work  |

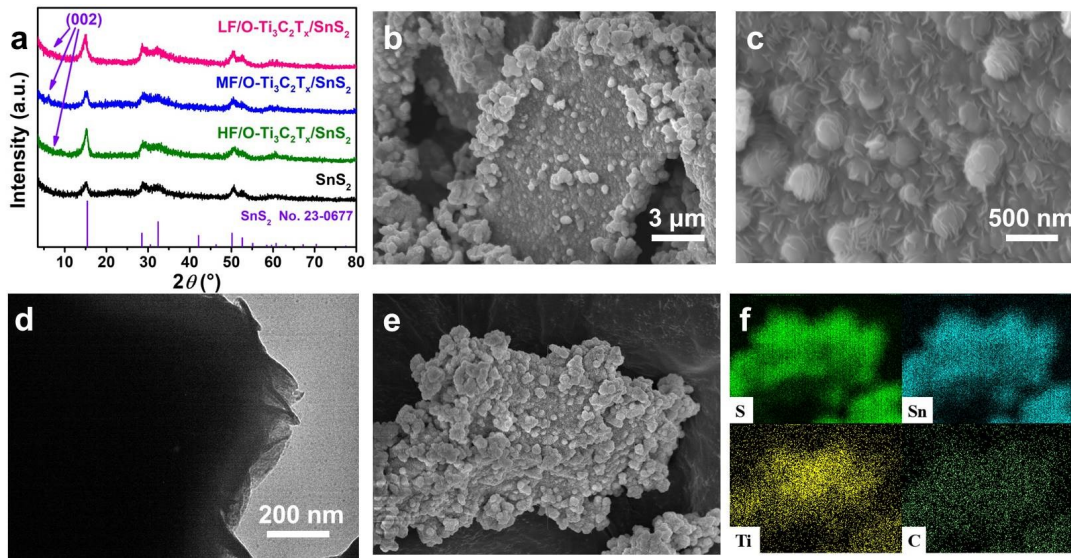

**Fig. S26** The structures and morphologies of LF/O-Ti<sub>3</sub>C<sub>2</sub>T<sub>x</sub>/SnS<sub>2</sub>: (a) XRD patterns, (b) low magnified, (c) high magnified SEM images, (d) TEM image, (e, f) EDS elemental mapping.

Consistent with LF/O-Ti<sub>3</sub>C<sub>2</sub>T<sub>x</sub>/MoS<sub>3</sub> and LF/O-Ti<sub>3</sub>C<sub>2</sub>T<sub>x</sub>/CuS, the dispersion of three kinds of titanium carbides was respectively added into a solution containing Sn<sup>4+</sup> and TAA. The formed SnS<sub>2</sub> crystal nucleus will deposit on the inner and outer surfaces of titanium carbide under a temperature of 60 °C. As presented in the XRD patterns (Fig. S26a), all the diffraction peaks for three composites located at 15.03°, 28.20°, 32.12°, 49.96° and 52.45° are well matched with hexagonal SnS<sub>2</sub> (JCPDS No. 23-0677). Two other weak diffraction peaks located before 10° and around 60° suggest the existence of Ti<sub>3</sub>C<sub>2</sub>T<sub>x</sub>. The magnified SEM images in Figs. S26b and S26c clearly show that some SnS<sub>2</sub> nanospheres and nanosheets are attached on the surface of LF/O-Ti<sub>3</sub>C<sub>2</sub>T<sub>x</sub> layers, suggesting the successful preparation of LF/O-Ti<sub>3</sub>C<sub>2</sub>T<sub>x</sub>. SEM mapping further shows the uniform distribution of Ti, C, Sn, S and O elements (Fig. S26e and S26f). The atomic ratio of Sn and S is 1: 2.1, which is in agreement with SnS<sub>2</sub>. The related TEM image of LF/O-Ti<sub>3</sub>C<sub>2</sub>T<sub>x</sub>/SnS<sub>2</sub> in Fig. S26d shows that the surface of LF/O-Ti<sub>3</sub>C<sub>2</sub>T<sub>x</sub> is uniformly coated by SnS<sub>2</sub> nanosheets.

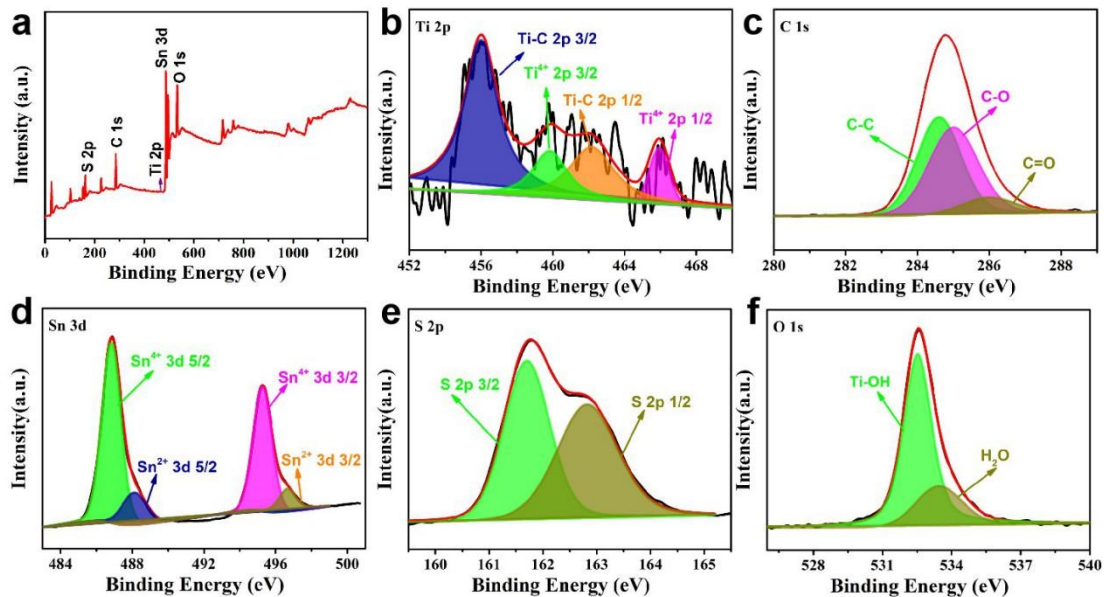

**Fig. S27** XPS spectra of (a) survey spectrum, high resolution spectra of (b) Ti 2p, (c) C 1s, (d) Sn 3d, (e) S 2p, (f) O 1s of LF/O-Ti<sub>3</sub>C<sub>2</sub>T<sub>x</sub>/SnS<sub>2</sub>.

The XPS survey spectrum of LF/O-Ti<sub>3</sub>C<sub>2</sub>T<sub>x</sub>/SnS<sub>2</sub> shown in Fig. S27a reveals the existence of signals peaks of Sn, S, Ti, O and C elements, demonstrating the successful synthesis of LF/O-Ti<sub>3</sub>C<sub>2</sub>T<sub>x</sub>/SnS<sub>2</sub>. As for the Ti 2p (Fig. S27b), the Ti-C peaks can be fitted with two peaks located at 456.0 and 462.1 eV. The peaks situated at 459.7 and 465.9 eV can be assigned to the Ti-OH of Ti<sup>4+</sup> 2p<sub>3/2</sub> and Ti<sup>4+</sup> 2p<sub>1/2</sub> [S25]. Three peaks located at 284.6, 285.0 and 286 eV for C1s spectrum are attributed to C-C, C-O and C=O, respectively (Fig. S27c). In the spectrum of Sn 3d exhibited in Fig. S27d, two primary peaks situated at 488.1 and 496.6 eV are indexed to Sn<sup>4+</sup> 3d<sub>5/2</sub> and 3d<sub>3/2</sub>, respectively. The other two weak peaks at 486.8 and 495.2 eV are assigned to Sn<sup>2+</sup> 3d<sub>5/2</sub> and Sn<sup>2+</sup> 3d<sub>3/2</sub>, respectively [S35,S36]. As shown in Fig. S27e, the two peaks located at 162.8 eV (S 2p<sub>1/2</sub>) and 161.7 eV (S 2p<sub>3/2</sub>) for S 2p spectrum are ascribed to S<sup>2-</sup> [S37]. Figure S27f shows the high-resolution XPS spectrum of O 1s, the two peaks centered at 533.4 and 532.5 eV are attributed to H<sub>2</sub>O and Ti-OH, respectively [S28].

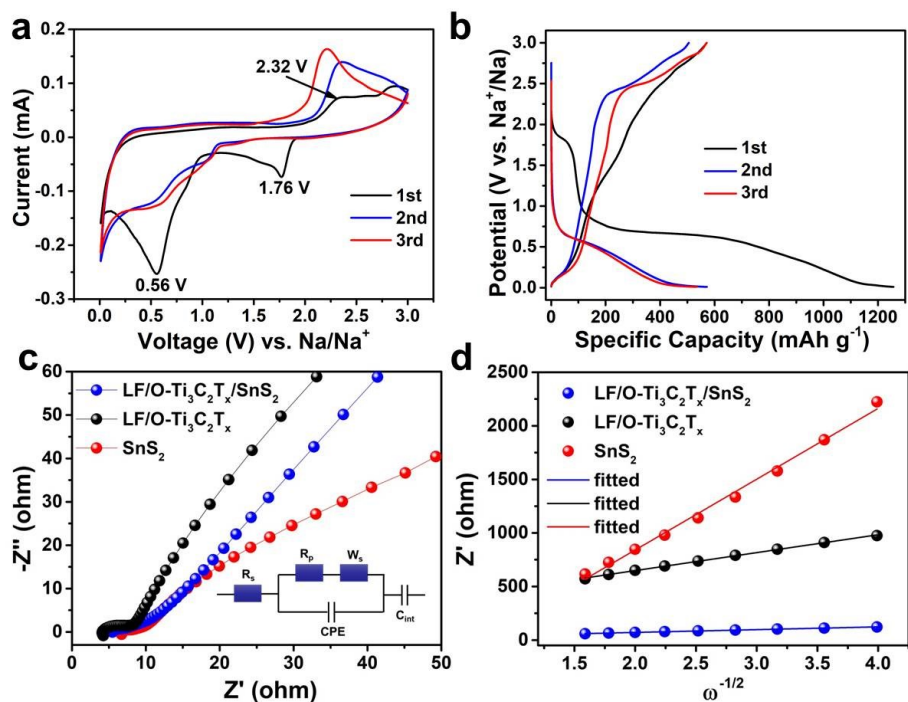

**Fig. S28** (a) CV curves of LF/O-Ti<sub>3</sub>C<sub>2</sub>T<sub>x</sub>/SnS<sub>2</sub> at 0.1 mV s<sup>-1</sup>, (b) charge/discharge curves, (c) EIS plots (the inset is equivalent circuit), (d) relationship between Z' and  $\omega^{-1/2}$  in the low frequency region of LF/O-Ti<sub>3</sub>C<sub>2</sub>T<sub>x</sub>/SnS<sub>2</sub> for SIBs.

Figure S28a shows the CV curves at 0.1 mV s<sup>-1</sup> of LF/O-Ti<sub>3</sub>C<sub>2</sub>T<sub>x</sub>/SnS<sub>2</sub>, which corresponds well with the charge/discharge profiles (Fig. S28b). The cathode peak located at 1.76 V for the first cycle is assigned as insertion of Na<sup>+</sup> into SnS<sub>2</sub> layers to form Na<sub>x</sub>SnS<sub>2</sub>, and this peak disappears in the following cycles, suggesting the intercalation reaction is irreversible. The strong peak of 0.56 V originates from the conversion reaction of SnS<sub>2</sub> to form Sn and Na<sub>2</sub>S and further alloying process of Sn to generate final Na<sub>3.75</sub>Sn phase as well as the formation of SEI film. The anodic peak at around 2.32 V for the initial cycle corresponds to the extraction reaction of sodium ion from Na<sub>x</sub>Sn and subsequent oxidation of Sn to SnS<sub>2</sub> [S38]. The cathodic and anodic peaks shift for the second and third cycles is resulted from the irreversible structural transformation [S39,S40]. The EIS results are shown in Figs. S28c and S28d illustrate the fast electron and ion transport kinetics of LF/O-Ti<sub>3</sub>C<sub>2</sub>T<sub>x</sub>/SnS<sub>2</sub>.



**Table S7** The sodium storage performance comparison of SnS<sub>2</sub> related composites.

| Samples                                                              | Current density<br>(mA g <sup>-1</sup> ) | Cycle numbers | Specific<br>capacity<br>(mAh g <sup>-1</sup> ) | Ref.         |
|----------------------------------------------------------------------|------------------------------------------|---------------|------------------------------------------------|--------------|
| SnS <sub>2</sub> @N,S-GA                                             | 20                                       | 50            | 527                                            | [4]          |
| SnS <sub>2</sub> /GCA                                                | 200                                      | 100           | 535                                            | [12]         |
| MXene/SnS <sub>2</sub>                                               | 100                                      | 200           | 322                                            | [41]         |
| 3D-GNS/SnS <sub>2</sub>                                              | 1000                                     | 1000          | 385                                            | [S37]        |
| P-SnS <sub>2</sub> @TiC/C                                            | 200                                      | 200           | 681                                            | [S39]        |
| ZnS/SnS <sub>2</sub> @N/S C                                          | 1000                                     | 120           | 537                                            | [S41]        |
| SnS <sub>2</sub> NP/TiO <sub>2</sub> @C                              | 500                                      | 100           | 543                                            | [S42]        |
|                                                                      | 2000                                     | 100           | 413                                            |              |
| SnS <sub>2</sub> @C                                                  | 200                                      | 200           | 626                                            | [S43]        |
| SnS <sub>2</sub> /NS-CNT                                             | 200                                      | 80            | 417                                            | [S44]        |
| SnS/SnS <sub>2</sub> @CC                                             | 1000                                     | 500           | 455                                            | [S45]        |
|                                                                      | 200                                      | 100           | 642                                            |              |
| SnS <sub>2</sub> /Sb <sub>2</sub> S <sub>3</sub> @rGO                | 1000                                     | 400           | 480                                            | [S46]        |
|                                                                      | 200                                      | 100           | 642                                            |              |
| SnS <sub>2</sub> /C                                                  | 50                                       | 100           | 600                                            | [S47]        |
| SnS <sub>2</sub> /RGO                                                | 200                                      | 100           | 841                                            | [S48]        |
|                                                                      | 500                                      | 100           | 766                                            |              |
| LF/O-Ti <sub>3</sub> C <sub>2</sub> T <sub>x</sub> /SnS <sub>2</sub> | 2000                                     | 400           | 574                                            | This<br>work |

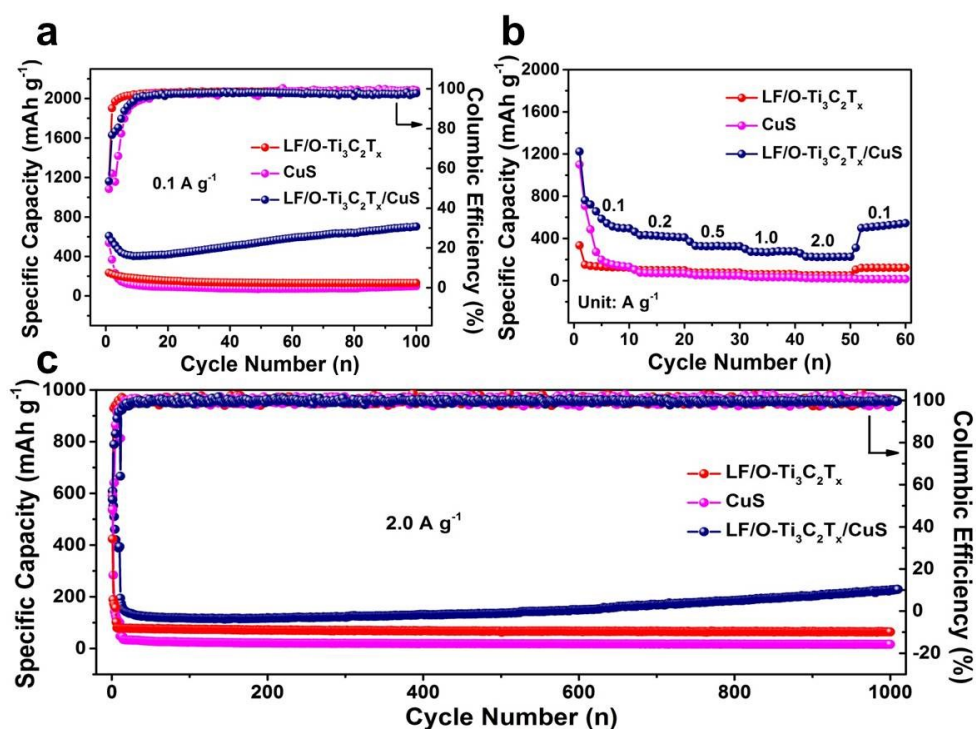

**Fig. S29** (a) cycling performance, (b) rate capabilities and (c) high-rate cycling performance of LF/O-Ti<sub>3</sub>C<sub>2</sub>T<sub>x</sub>/CuS for LIBs.

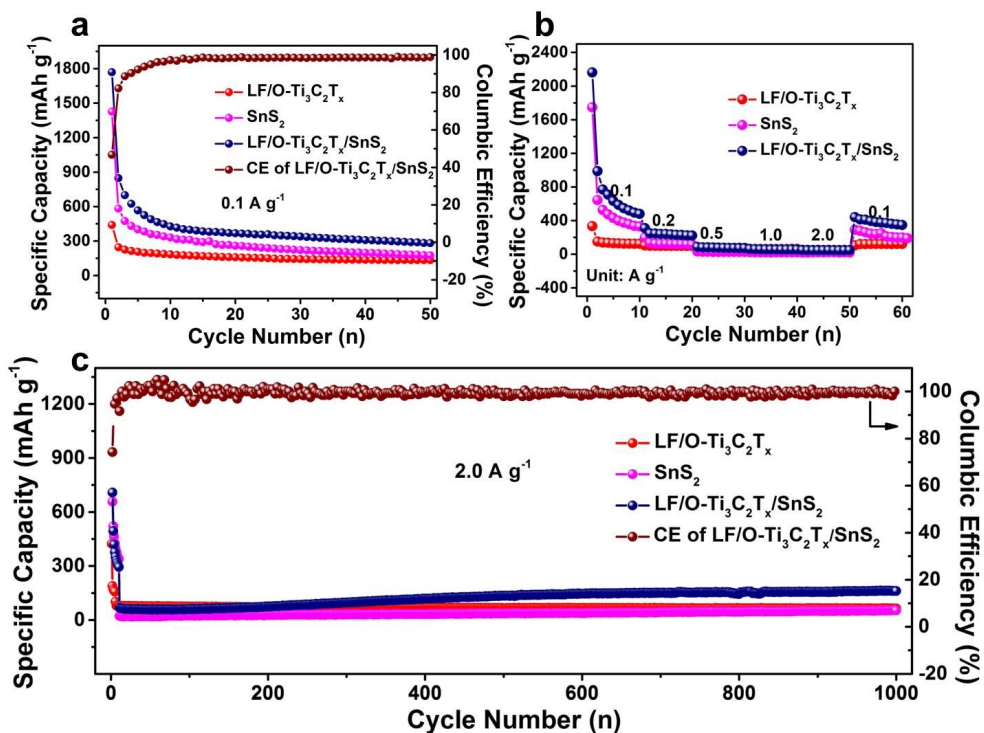

**Fig. S30** (a) cycling performance, (b) rate capabilities and (c) high-rate cycling performance of LF/O-Ti<sub>3</sub>C<sub>2</sub>T<sub>x</sub>/SnS<sub>2</sub> for LIBs.

## Supplementary References

- [S1] G. Xu, L. Yang, X. Wei, J. Ding, J. Zhong and P. K. Chu, *Adv. Funct. Mater.*, 2016, **26**, 3349-3358.
- [S2] H. Ye, L. Wang, S. Deng, X. Zeng, K. Nie, P. N. Duchesne, B. Wang, S. Liu, J. Zhou, F. Zhao, N. Han, P. Zhang, J. Zhong, X. Sun, Y. Li, Y. Li and J. Lu, *Adv. Energy Mater.*, 2017, **7**, 1601602.
- [S3] L. Cao, X. Liang, X. Ou, X. Yang, Y. Li, C. Yang, Z. Lin and M. Liu, *Adv. Funct. Mater.*, 2020, **30**, 1910732.
- [S4] A. Cheng, H. Zhang, W. Zhong, Z. Li, D. Cheng, Y. Lin, Y. Tang, H. Shao and Z. Li, *Carbon*, 2020, **168**, 691-700.
- [S5] W. Zhang, H. Zhou, Z. Huang, S. Li, C. Wang, H. Li, Z. Yan, T. Hou and Y. Kuang, *J. Energy Chem.*, 2020, **49**, 307-315.
- [S6] S. Anwer, Y. Huang, B. Li, B. Govindan, K. Liao, J. C. W, F. Wu, R. Chen and L. Zheng, *ACS Appl. Mater. Interfaces*, 2019, **11**, 22323-22331.
- [S7] G. K. Veerasubramani, M.-S. Park, G. Nagaraju and D.-W. Kim, *J. Mater. Chem. A*, 2019, **7**, 24557-24568.
- [S8] Y. Li, R. Zhang, W. Zhou, X. Wu, H. Zhang and J. Zhang, *ACS Nano*, 2019, **13**, 5533-5540.
- [S9] D. Sun, D. Ye, P. Liu, Y. Tang, J. Guo, L. Wang and H. Wang, *Adv. Energy Mater.*, 2018, **8**, 1702383.
- [S10] G. Wang, X. Bi, H. Yue, R. Jin, Q. Wang, S. Gao and J. Lu, *Nano Energy*, 2019, **60**, 362-370.
- [S11] J. H. Peng, X. Z. Chen, W. J. Ong, X. Zhao and N. Li, *Chem.*, 2019, **1**, 18–50.
- [S12] W. Zheng, P. Zhang, J. Chen, W. B. Tian, Y. M. Zhang and Z. M. Sun, *J. Mater. Chem. A*, 2018, **6**, 3543–3551.
- [S13] Z. Lin, D. Sun, Q. Huang, J. Yang, M. W. Barsoum and X. Yan, *J. Mater. Chem. A*, 2015, **3**, 14096–14100.
- [S14] G. Du, M. Tao, W. Gao, Y. Zhang, R. Zhan, S. Bao and M. Xu, *Inorg. Chem.*

- Front.*, 2019, **6**, 117-125.
- [S15] Z. Ma, X. Zhou, W. Deng, D. Lei and Z. Liu, *ACS Appl. Mater. Interfaces*, 2018, **10**, 3634–3643.
- [S16] Y. S. Wang, Y. Y. Li and S. P. Zhuo, *J. Mater. Chem. A*, 2018, **6**, 11189–11197.
- [S17] F. Wang, Z Wang and C Yang, *J. Mater. Sci.*, 2017, **52**, 3556–3565.
- [S18] P. Zhang, D. Wang, Q. Zhu, N. Sun, F. Fu and B. Xu, *Nano-Micro Lett.*, 2019, **11**, 81.
- [S19] S. Zhang, X.Y. Li, W. Yang, H. Tian, Z. Han , H. Ying, G. Wang and W. Han, *ACS Appl. Mater. Interfaces*, 2019, **11**, 42086–42093.
- [S20] X. Sun, K. Tan, Y. Liu, J. Zhang, D. Deni, F. Zaman, L. Hou and C. Yuanet, *Nanoscale*, 2019, **11**, 16755–16766.
- [S21] Y. Huang, H. Yang, Y. Zhang, Y. Zhang, Y. Wu, M. Tian, P. Chen, R. Trout, Y. Ma, T. Wu, Y. Wu and N. Liu, *J. Mater. Chem. A*, 2019, **7**, 11350–11356.
- [S22] J. Ai, Y. Lei, S. Yang, C. Lai and Q. Xu, *Chem. Eng. J.*, 2019, **357**, 150–158.
- [S23] M. Lu, H. Li, W. Han, Y. Wang, W. Sh, J. Wang, H. Chen, H. Li, B. Zhang, W. Zhang and W. Zheng, *Nanoscale*, 2019, **11**, 15037–15042.
- [S24] C. Wang, X Zhu, Y. Mao, F. Wang, X. Gao, S. Qiu, S. Leb and K.N. Sun, *Chem. Commun.*, 2019, **55**, 1337–1340.
- [S25] X. Wu, Z. Wang, M. Yu, L. Xiu and J. Qiu, *Adv. Mater.*, 2017, **29**, 1607017.
- [S26] S. Li, Z. Ge, B. Zhang, Y. Yao and H. Wang, *Appl. Surf. Sci.*, 2016, **384**, 272-278.
- [S27] S.I. Raj and A. Jaiswal, *J. Photoch. Photobio. A.*, 2021, **410**, 113185.
- [S28] Z. Pan, F. Cao, X. Hu and X. Ji, *J. Mater. Chem. A*, 2019, **7**, 8984-8992.
- [S29] D. Yu, M. Li, T. Yu, C. Wang, Y. Zeng, X. Hu, G. Chen, J. Yang and F. Du, *J. Mater. Chem. A*, 2019, **7**, 10619-10628.
- [S30] R. Zhao, H. Di, X. Hui, D. Zhao, R. Wang, C. Wang and L. Yin, *Energ. Environ. Sci.*, 2020, **13**, 246–257.
- [S31] D. Zhao, M. Yin, C. Feng, K. Zhan, Q. Jiao, H. Li and Y. Zhao, *ACS Sustain. Chem. Eng.*, 2020, **8**, 11317-11327.

- [S32] H. Li, Y. Wang, J. Jiang, Y. Zhang, Y. Peng and J. Zhao, *Electrochim. Acta*, 2017, **247**, 851-859.
- [S33] L. Wu, J. Gao, Z. Qin, Y. Sun, R. Tian, Q. Zhang and Y. Gao, *J. Power Sources*, 2020, **479**, 228518.
- [S34] J. Li, D. Yan, T. Lu, W. Qin, Y. Yao and L. Pan, *ACS Appl. Mater. Interfaces*, 2017, **9**, 2309-2316.
- [S35] H. Tang, R. Guo, M. Jiang, Y. Zhang, X. Lai, C. Cui, H. Xiao, S. Jiang, E. Ren and Q. Qin, *J. Power Sources*, 2020, **462**, 228152.
- [S36] S. Guan, T. Wang, X. Fu, L. Fan and Z. Peng, *Appl. Surf. Sci.*, 2020, **508**, 145241.
- [S37] Z. Sang, X. Yan, D. Su, H. Ji, S. Wang, S. Dou and J. Liang, *Small*, 2020, **16**, 2001265.
- [S38] Y. Zhang, P. Zhu, L. Huang, J. Xie, S. Zhang, G. Cao and X. Zhao, *Adv. Funct. Mater.*, 2015, **25**, 481-489.
- [S39] Y. Shen, S. Deng, P. Liu, Y. Zhang, Y. Li, X. Tong, H. Shen, Q. Liu, G. Pan, L. Zhang, X. Xia and J. Tu, *Small*, 2020, **16**, 2004072.
- [S40] X. Shi, S. Chen, H. Fan, X. Chen, D. Yuan, Q. Tang, A. Hu, W. Luo and H. Liu, *ChemSusChem*, 2019, **12**, 4046-4053.
- [S41] L. Cao, B. Zhang, X. Ou, C. Wang, C. Peng and J. Zhang, *Small*, 2019, **15**, 1804861.
- [S42] X. Hu, Q. Peng, T. Zeng, B. Shang, X. Jiao and G. Xi, *Chem. Eng. J.*, 2019, **363**, 213-223.
- [S43] S. Li, Z. Zhao, C. Li, Z. Liu and D. Li, *Nano-Micro Lett.*, 2019, **11**, 14.
- [S44] Z. Liu, A. Daali, G. L. Xu, M. Zhuang, X. Zuo, C. J. Sun, Y. Liu, Y. Cai, M. D. Hossain, H. Liu, K. Amine and Z. Luo, *Nano Lett.*, 2020, **20**, 3844-3851.
- [S45] J. Lu, S. Zhao, S. Fan, Q. Lv, J. Li and R. Lv, *Carbon*, 2019, **148**, 525-531.
- [S46] S. Wang, S. Liu, X. Li, C. Li, R. Zang, Z. Man, Y. Wu, P. Li and G. Wang, *Chem.*, 2018, **24**, 3873-3881.
- [S47] J. Wang, C. Luo, J. Mao, Y. Zhu, X. Fan, T. Gao, A. C. Mignerey and C. Wang, *ACS Appl. Mater. Interfaces*, 2015, **7**, 11476-11481.

[S48] B. Zhao, D. Song, Y. Ding, W. Li, Z. Wang, Y. Jiang and J. Zhang,  
*Electrochim. Acta*, 2020, **354**, 136730.
